# Supplementary material for: SPANG: a SPARQL client supporting generation and reuse of queries for distributed RDF databases
Source: PubMed Central journal article supplement (PMC5299738; doi:10.1186/s12859-017-1531-1), 2017-02-08
Supplement: 12859_2017_1531_MOESM1_ESM.pdf [file 12859_2017_1531_MOESM1_ESM.pdf]

List of SPARQL shortcuts with example usages.

| Shortcut | Description                  | Example Usage                                             | Generated SPARQL pattern                                                                                           |
|----------|------------------------------|-----------------------------------------------------------|--------------------------------------------------------------------------------------------------------------------|
| -S       | Specify a subject            | -S uniprot:K9Z723                                         | SELECT ?p ?o<br>WHERE {<br>uniprot:K9Z723 ?p ?o<br>}                                                               |
|          |                              | -S uniprot:K9Z723 -f n-triples                            | CONSTRUCT {<br>uniprot:K9Z723 ?p ?o<br>}<br>WHERE {<br>uniprot:K9Z723 ?p ?o<br>}                                   |
|          |                              | -S 1                                                      | SELECT ?v1 ?p ?o<br>WHERE {<br>VALUES (?v1) { \$STDIN }<br>?v1 ?p ?o<br>}                                          |
| -P       | Specify a predicate          | -P rdfs:label                                             | SELECT ?s ?o<br>WHERE {<br>?s rdfs:label ?o<br>}                                                                   |
| -O       | Specify an object            | -O tax:9606                                               | SELECT ?s ?p<br>WHERE {<br>?s ?p tax:9606<br>}                                                                     |
| -L       | Limit outputs                | -L 10                                                     | SELECT ?s ?p ?o<br>WHERE {<br>?s ?p ?o<br>}<br>LIMIT 10                                                            |
|          |                              | -S uniprot:K9Z723 -L 10                                   | SELECT ?p ?o<br>WHERE {<br>uniprot:K9Z723 ?p ?o<br>}<br>LIMIT 10                                                   |
| -N       | Output the number of results | -N                                                        | SELECT COUNT(*)<br>WHERE {<br>?s ?p ?o<br>}                                                                        |
|          |                              | -N -O tax:9606                                            | SELECT COUNT(*)<br>WHERE {<br>?s ?p tax:9606<br>}                                                                  |
| -G       | Output graphs                | -G                                                        | SELECT ?graph<br>WHERE {<br>GRAPH ?graph {<br>?s ?p ?o<br>}<br>}<br>GROUP BY ?graph<br>ORDER BY ?graph             |
|          |                              | -S uniprot:K9Z723 -G                                      | SELECT ?graph<br>WHERE {<br>GRAPH ?graph {<br>uniprot:K9Z723 ?p ?o<br>}<br>}<br>GROUP BY ?graph<br>ORDER BY ?graph |
| -F       | From a specific graph        | -F 'http://sparql.uniprot.org/uniprot/'                   | CONSTRUCT {<br>?s ?p ?o<br>}<br>FROM <http://sparql.uniprot.org/uniprot/><br>WHERE {<br>?s ?p ?o<br>}              |
|          |                              | -F 'http://sparql.uniprot.org/uniprot/' -S uniprot:K9Z723 | SELECT ?p ?o<br>FROM <http://sparql.uniprot.org/uniprot/><br>WHERE {<br>uniprot:K9Z723 ?p ?o<br>}                  |
|          |                              | -F 'http://sparql.uniprot.org/uniprot/' -N                | SELECT COUNT(*)<br>FROM <http://sparql.uniprot.org/uniprot/><br>WHERE {<br>?s ?p ?o<br>}                           |
