# Supplementary material for: SPANG: a SPARQL client supporting generation and reuse of queries for distributed RDF databases
Source: PubMed Central journal article supplement (PMC5299738; doi:10.1186/s12859-017-1531-1), 2017-02-08
Supplement: 12859_2017_1531_MOESM2_ESM.pdf [file 12859_2017_1531_MOESM2_ESM.pdf]

## Codes of the SPARQL templates used as examples in the main text.

### 1) uniprot\_annot (included in the SPANG package)

Given a UniProt ID as a parameter, retrieve its gene name, organism name, and functional annotation.

The target database is UniProt.

```
SELECT ?gene ?organism ?function
WHERE {
  uniprot:$1 up:encodedBy/skos:prefLabel ?gene ;
  up:organism/up:scientificName ?organism ;
  up:annotation ?annot .
  ?annot a up:Function_Annotation ;
  rdfs:comment ?function .
}
```

### 2) regex\_class (included in the SPANG package)

Given a regular expression as a parameter, find classes with labels matching the pattern.

The target database is not limited to a specific one but arbitrary ones.

```
SELECT ?class ?label
WHERE {
  ?class a owl:Class ;
  rdfs:label ?label .
  FILTER regex(?label, "$1", "i")
}
```

### 3) mbgd:get\_ortholog (published at [http://mbgd.genome.ad.jp/sparql/library/get\\_ortholog](http://mbgd.genome.ad.jp/sparql/library/get_ortholog))

Given a UniProt ID as a parameter, retrieve its orthologs through the MBGD ortholog group.

The target database is MBGD.

```
SELECT ?uniprot
WHERE {
  ?group a orthology:OrthologsCluster ;
  orthology:hasHomologous/mbgd:gene/mbgd:uniprot uniprot:$1 ;
  orthology:hasHomologous/mbgd:gene/mbgd:uniprot ?uniprot ;
  void:inDataset mbgdr:default .
}
```

### 4) uniprot\_xref (included in the SPANG package)

Given UniProt IDs from standard input and a database name as a parameter, retrieve their cross-references to the specified database.

The target database is UniProt.

```
SELECT ?uniprot ?xref
WHERE {
  VALUES (?uniprot) { $STDIN }
  ?uniprot rdfs:seeAlso ?xref .
  ?xref up:database <http://purl.uniprot.org/database/$1> .
}
```

### 5) diff\_expr (included in the SPANG package)

Given a sample condition for expression profile, retrieve differentially expressed genes in the specified condition.

The target database Gene Expression Atlas.

```
SELECT ?uniprot ?probe ?experiment ?pubmed ?expr_label
WHERE {
  ?experiment atlas:pubmedid ?pubmed ;
    atlas:hasAnalysis/atlas:hasExpressionValue ?diff_expr .
  ?diff_expr rdfs:label ?expr_label ;
    atlas:hasFactorValue/a efo:$1 ;
    atlas:isMeasurementOf ?probe .
  ?probe atlas:dbXref ?uniprot .
  ?uniprot a atlas:UniprotDatabaseReference .
}
```

### 6) filter\_by\_go (included in the SPANG package)

Given UniProt IDs from standard input and a GO ID as a parameter, output proteins with the specified GO annotation.

The target database is UniProt.

```
SELECT ?uniprot
WHERE {
  VALUES (?uniprot) { $STDIN }
  ?uniprot up:classifiedWith obo:$1 .
}
```
